# Supplementary material for: Intra-Articular Injection of 2 Different Dosages of Autologous and Allogeneic Bone Marrow- and Umbilical Cord-Derived Mesenchymal Stem Cells Triggers a Variable Inflammatory Response of the Fetlock Joint on 12 Sound Experimental Horses
Source: Hindawi journal article supplement (doi:10.1155/2019/9431894), 2019-05-02

Concentration = 5 million cells per mL of PBS; T°C = 25

|       | UCB-01                |                            |             |             | BM-07                 |                            |             |             |
|-------|-----------------------|----------------------------|-------------|-------------|-----------------------|----------------------------|-------------|-------------|
|       | Total number of cells | Total number of dead cells | % mortality | % viability | Total number of cells | Total number of dead cells | % mortality | % viability |
| T= 0h | 91                    | 0                          | 0,00        | 100,00      | 100                   | 1                          | 1,00        | 99,00       |
| T= 1h | 149                   | 12                         | 8,05        | 91,95       | 100                   | 0                          | 0,00        | 100,00      |
| T= 2h | 82                    | 9                          | 10,98       | 89,02       | 100                   | 2                          | 2,00        | 98,00       |
| T= 4h | 99                    | 8                          | 8,08        | 91,92       | 100                   | 12                         | 12,00       | 88,00       |
| T= 6h | 80                    | 12                         | 15,00       | 85,00       | 110                   | 15                         | 13,64       | 86,36       |

|       | UCB-02                |                            |             |             | BM-08                 |                            |             |             |
|-------|-----------------------|----------------------------|-------------|-------------|-----------------------|----------------------------|-------------|-------------|
|       | Total number of cells | Total number of dead cells | % mortality | % viability | Total number of cells | Total number of dead cells | % mortality | % viability |
| T= 0h | 127                   | 0                          | 0,00        | 100,00      | 103                   | 6                          | 5,83        | 94,17       |
| T= 1h | 77                    | 4                          | 5,19        | 94,81       | 101                   | 5                          | 4,95        | 95,05       |
| T= 2h | 82                    | 8                          | 9,76        | 90,24       | 100                   | 4                          | 4,00        | 96,00       |
| T= 4h | 127                   | 10                         | 7,87        | 92,13       | 100                   | 10                         | 10,00       | 90,00       |
| T= 6h | 89                    | 8                          | 8,99        | 91,01       | 97                    | 4                          | 4,12        | 95,88       |

|       | UCB-03                |                            |             |             | BM-09                 |                            |             |             |
|-------|-----------------------|----------------------------|-------------|-------------|-----------------------|----------------------------|-------------|-------------|
|       | Total number of cells | Total number of dead cells | % mortality | % viability | Total number of cells | Total number of dead cells | % mortality | % viability |
| T= 0h | 80                    | 0                          | 0,00        | 100,00      | 100                   | 0                          | 0,00        | 100,00      |
| T= 1h | 89                    | 2                          | 2,25        | 97,75       | 101                   | 5                          | 4,95        | 95,05       |
| T= 2h | 92                    | 15                         | 16,30       | 83,70       | 100                   | 3                          | 3,00        | 97,00       |
| T= 4h | 68                    | 3                          | 4,41        | 95,59       | 100                   | 9                          | 9,00        | 91,00       |
| T= 6h | 91                    | 7                          | 7,69        | 92,31       | 79                    | 12                         | 15,19       | 84,81       |

|       | UCB-04                |                            |             |             | BM-10                 |                            |             |             |
|-------|-----------------------|----------------------------|-------------|-------------|-----------------------|----------------------------|-------------|-------------|
|       | Total number of cells | Total number of dead cells | % mortality | % viability | Total number of cells | Total number of dead cells | % mortality | % viability |
| T= 0h | 92                    | 2                          | 2,17        | 97,83       | 113                   | 0                          | 0,00        | 100,00      |
| T= 1h | 16                    | 0                          | 0,00        | 100,00      | 117                   | 7                          | 5,98        | 94,02       |
| T= 2h | 84                    | 12                         | 14,29       | 85,71       | 110                   | 4                          | 3,64        | 96,36       |
| T= 4h | 78                    | 13                         | 16,67       | 83,33       | 104                   | 6                          | 5,77        | 94,23       |
| T= 6h | 73                    | 6                          | 8,22        | 91,78       | 114                   | 5                          | 4,39        | 95,61       |

|       | UCB-05                |                            |             |             | BM-11                 |                            |             |             |
|-------|-----------------------|----------------------------|-------------|-------------|-----------------------|----------------------------|-------------|-------------|
|       | Total number of cells | Total number of dead cells | % mortality | % viability | Total number of cells | Total number of dead cells | % mortality | % viability |
| T= 0h | 83                    | 3                          | 3,61        | 96,39       | 100                   | 2                          | 2,00        | 98,00       |
| T= 1h | 68                    | 10                         | 14,71       | 85,29       | 100                   | 1                          | 1,00        | 99,00       |
| T= 2h | 90                    | 12                         | 13,33       | 86,67       | 160                   | 13                         | 8,13        | 91,88       |
| T= 4h | 64                    | 12                         | 18,75       | 81,25       | 156                   | 18                         | 11,54       | 88,46       |
| T= 6h | 71                    | 5                          | 7,04        | 92,96       | 135                   | 18                         | 13,33       | 86,67       |

|       | UCB-06                |                            |             |             | BM-12                 |                            |             |             |
|-------|-----------------------|----------------------------|-------------|-------------|-----------------------|----------------------------|-------------|-------------|
|       | Total number of cells | Total number of dead cells | % mortality | % viability | Total number of cells | Total number of dead cells | % mortality | % viability |
| T= 0h | 81                    | 4                          | 4,94        | 95,06       | 131                   | 4                          | 3,05        | 96,95       |
| T= 1h | 80                    | 9                          | 11,25       | 88,75       | 154                   | 16                         | 10,39       | 89,61       |
| T= 2h | 81                    | 20                         | 24,69       | 75,31       | 149                   | 15                         | 10,07       | 89,93       |
| T= 4h | 41                    | 6                          | 14,63       | 85,37       | 140                   | 13                         | 9,29        | 90,71       |
| T= 6h | 26                    | 9                          | 34,62       | 65,38       | 141                   | 14                         | 9,93        | 90,07       |

Concentration = 10 million cells per mL of PBS; T°C = 25

|       | UCB-01                |                            |             |             | BM-01                 |                            |             |             |
|-------|-----------------------|----------------------------|-------------|-------------|-----------------------|----------------------------|-------------|-------------|
|       | Total number of cells | Total number of dead cells | % mortality | % viability | Total number of cells | Total number of dead cells | % mortality | % viability |
| T= 0h | 91                    | 0                          | 0,00        | 100,00      | 125                   | 3                          | 2,40        | 97,60       |
| T= 1h | 57                    | 2                          | 3,51        | 96,49       | 100                   | 4                          | 4,00        | 96,00       |
| T= 2h | 66                    | 14                         | 21,21       | 78,79       | 140                   | 4                          | 2,86        | 97,14       |
| T= 4h | 79                    | 8                          | 10,13       | 89,87       | 100                   | 6                          | 6,00        | 94,00       |
| T= 6h | 66                    | 5                          | 7,58        | 92,42       | 100                   | 6                          | 6,00        | 94,00       |

|       | UCB-02                |                            |             |             | BM-02                 |                            |             |             |
|-------|-----------------------|----------------------------|-------------|-------------|-----------------------|----------------------------|-------------|-------------|
|       | Total number of cells | Total number of dead cells | % mortality | % viability | Total number of cells | Total number of dead cells | % mortality | % viability |
| T= 0h | 127                   | 0                          | 0,00        | 100,00      | 100                   | 2                          | 2,00        | 98,00       |
| T= 1h | 46                    | 3                          | 6,52        | 93,48       | 130                   | 3                          | 2,31        | 97,69       |
| T= 2h | 55                    | 2                          | 3,64        | 96,36       | 131                   | 14                         | 10,69       | 89,31       |
| T= 4h | 40                    | 4                          | 10,00       | 90,00       | 133                   | 14                         | 10,53       | 89,47       |
| T= 6h | 44                    | 8                          | 18,18       | 81,82       | 141                   | 15                         | 10,64       | 89,36       |

|       | UCB-06                |                            |             |             | BM-03                 |                            |             |             |
|-------|-----------------------|----------------------------|-------------|-------------|-----------------------|----------------------------|-------------|-------------|
|       | Total number of cells | Total number of dead cells | % mortality | % viability | Total number of cells | Total number of dead cells | % mortality | % viability |
| T= 0h | 80                    | 0                          | 0,00        | 100,00      | 131                   | 4                          | 3,05        | 96,95       |
| T= 1h | 95                    | 6                          | 6,32        | 93,68       | 120                   | 2                          | 1,67        | 98,33       |
| T= 2h | 85                    | 13                         | 15,29       | 84,71       | 122                   | 13                         | 10,66       | 89,34       |
| T= 4h | 55                    | 6                          | 10,91       | 89,09       | 130                   | 12                         | 9,23        | 90,77       |
| T= 6h | 71                    | 6                          | 8,45        | 91,55       | 113                   | 7                          | 6,19        | 93,81       |

|       | UCB-14                |                            |             |             | BM-04                 |                            |             |             |
|-------|-----------------------|----------------------------|-------------|-------------|-----------------------|----------------------------|-------------|-------------|
|       | Total number of cells | Total number of dead cells | % mortality | % viability | Total number of cells | Total number of dead cells | % mortality | % viability |
| T= 0h | 92                    | 2                          | 2,17        | 97,83       | 100                   | 1                          | 1,00        | 99,00       |
| T= 1h | 96                    | 18                         | 18,75       | 81,25       | 100                   | 0                          | 0,00        | 100,00      |
| T= 2h | 104                   | 14                         | 13,46       | 86,54       | 100                   | 5                          | 5,00        | 95,00       |
| T= 4h | 71                    | 8                          | 11,27       | 88,73       | 100                   | 13                         | 13,00       | 87,00       |
| T= 6h | 81                    | 10                         | 12,35       | 87,65       | 100                   | 22                         | 22,00       | 78,00       |

|       | UCB-15                |                            |             |             | BM-05                 |                            |             |             |
|-------|-----------------------|----------------------------|-------------|-------------|-----------------------|----------------------------|-------------|-------------|
|       | Total number of cells | Total number of dead cells | % mortality | % viability | Total number of cells | Total number of dead cells | % mortality | % viability |
| T= 0h | 83                    | 3                          | 3,61        | 96,39       | 103                   | 6                          | 5,83        | 94,17       |
| T= 1h | 105                   | 10                         | 9,52        | 90,48       | 121                   | 5                          | 4,13        | 95,87       |
| T= 2h | 77                    | 8                          | 10,39       | 89,61       | 104                   | 11                         | 10,58       | 89,42       |
| T= 4h | 68                    | 12                         | 17,65       | 82,35       | 100                   | 12                         | 12,00       | 88,00       |
| T= 6h | 49                    | 7                          | 14,29       | 85,71       | 100                   | 7                          | 7,00        | 93,00       |

|       | UCB-17                |                            |             |             | BM-06                 |                            |             |             |
|-------|-----------------------|----------------------------|-------------|-------------|-----------------------|----------------------------|-------------|-------------|
|       | Total number of cells | Total number of dead cells | % mortality | % viability | Total number of cells | Total number of dead cells | % mortality | % viability |
| T= 0h | 81                    | 4                          | 4,94        | 95,06       | 100                   | 0                          | 0,00        | 100,00      |
| T= 1h | 128                   | 21                         | 16,41       | 83,59       | 127                   | 8                          | 6,30        | 93,70       |
| T= 2h | 70                    | 13                         | 18,57       | 81,43       | 100                   | 14                         | 14,00       | 86,00       |
| T= 4h | 59                    | 6                          | 10,17       | 89,83       | 100                   | 5                          | 5,00        | 95,00       |
| T= 6h | 61                    | 7                          | 11,48       | 88,52       | 95                    | 16                         | 16,84       | 83,16       |

Mean viability (%) - 5.10<sup>6</sup> cells/mL

| Time (hours) | 5 million/mL BM - MSCs |      | 5 million/mL UCB - MSCs |       |
|--------------|------------------------|------|-------------------------|-------|
|              | Mean                   | SD   | Mean                    | SD    |
| 0            | 98,02                  | 2,22 | 98,21                   | 2,19  |
| 1            | 95,45                  | 3,74 | 93,09                   | 6,12  |
| 2            | 94,86                  | 3,20 | 85,11                   | 5,27  |
| 4            | 90,40                  | 2,23 | 88,26                   | 6,04  |
| 6            | 89,90                  | 4,84 | 86,41                   | 11,69 |

Mean viability (%) - 10.10<sup>6</sup> cells/mL

| Time (hours) | 10 million/mL BM - MSCs |      | 10 million/mL UCB - MSCs |      |
|--------------|-------------------------|------|--------------------------|------|
|              | Mean                    | SD   | Mean                     | SD   |
| 0            | 98,87                   | 2,00 | 98,21                    | 2,19 |
| 1            | 96,57                   | 2,21 | 89,83                    | 6,51 |
| 2            | 92,71                   | 4,17 | 86,24                    | 4,24 |
| 4            | 92,00                   | 3,22 | 88,31                    | 3,18 |
| 6            | 85,05                   | 6,61 | 87,95                    | 2,78 |

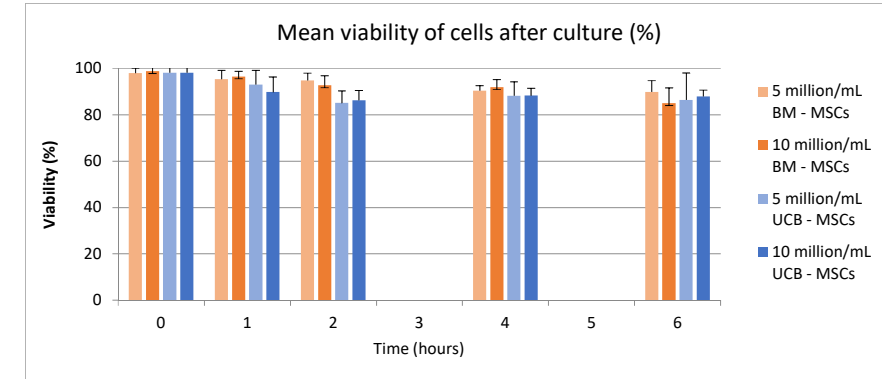

Supplement: f1 [file 9431894.f1.pdf]
