# Supplementary material for: Intra-Articular Injection of 2 Different Dosages of Autologous and Allogeneic Bone Marrow- and Umbilical Cord-Derived Mesenchymal Stem Cells Triggers a Variable Inflammatory Response of the Fetlock Joint on 12 Sound Experimental Horses
Source: PubMed Central journal article supplement (PMC6525957; doi:10.1155/2019/9431894), 2019-05-02
Supplement: 9431894.f7.pdf [file 9431894.f7.pdf]

## Supplementary Tables

**Table S1:** Distribution of stem cell treatments

|                                             | <b>LF</b>          | <b>RF</b>          | <b>LH</b>          | <b>RH</b>          |
|---------------------------------------------|--------------------|--------------------|--------------------|--------------------|
| <b>Distribution 1<br/>(horses 1 and 7)</b>  | Allogenic BM-MSCs  | Autologous BM-MSCs | PBS                | Allogenic UCB-MSCs |
| <b>Distribution 2<br/>(horses 2 and 8)</b>  | Allogenic BM-MSCs  | Autologous BM-MSCs | Allogenic UCB-MSCs | PBS                |
| <b>Distribution 3<br/>(horses 3 and 9)</b>  | Autologous BM-MSCs | Allogenic BM-MSCs  | PBS                | Allogenic UCB-MSCs |
| <b>Distribution 4<br/>(horses 4 and 10)</b> | Allogenic UCB-MSCs | PBS                | Autologous BM-MSCs | Allogenic BM-MSCs  |
| <b>Distribution 5<br/>(horses 5 and 11)</b> | Allogenic UCB-MSCs | PBS                | Allogenic BM-MSCs  | Autologous BM-MSCs |
| <b>Distribution 6<br/>(horses 6 and 12)</b> | PBS                | Allogenic UCB-MSCs | Autologous BM-MSCs | Allogenic BM-MSCs  |

*LF – Left front fetlock ; RF – Right front fetlock ; LH– Left hind fetlock ; RH – Right hind fetlock  
MSCs – Mesenchymal stem cells; PBS – Phosphate Buffered Saline; BM – Bone marrow; UCB – Umbilical cord blood*

**Table S2:** Quality control of MSCs – List of pathogens

|                                                                                      |
|--------------------------------------------------------------------------------------|
| Equine viral arteritis                                                               |
| Equine influenza virus                                                               |
| Equine coronavirus                                                                   |
| Type A equine rhinovirus                                                             |
| Type B equine rhinovirus                                                             |
| Type 1 equine adenovirus                                                             |
| Type 2 equine adenovirus                                                             |
| Equine hepacivirus                                                                   |
| Herpesvirus                                                                          |
| Aerobic and anaerobic bacteria                                                       |
| Yeasts, molds and aerobic bacteria                                                   |
| Lyme disease ( <i>Borrelia</i> )                                                     |
| Mycoplasma                                                                           |
| Q fever ( <i>Coxiella burnetti</i> )                                                 |
| Ehrlichiosis ( <i>Anaplasma phagocytophilum</i> )                                    |
| Pathogenic Leptospira                                                                |
| Chlamydia infection ( <i>Chlamydophila abortus</i> , <i>Chlamydophila psittaci</i> ) |
| Piroplasmosis ( <i>Babesia caballi</i> )                                             |
| Piroplasmosis ( <i>Theileria equi</i> )                                              |

**Table S3: Sensitivity to digital flexion tests grading system**

| Score |             | Physical criteria                                                                                                        |
|-------|-------------|--------------------------------------------------------------------------------------------------------------------------|
| 0     | Normal      | No reaction of the horse to the flexion of the fetlock joint when using a moderate strength (3kg).                       |
| 1     | Mild        | Reaction of the horse (withdrawal of the limb) to the flexion of the fetlock joint when using a moderate strength (3kg). |
| 2     | Moderate    | Reaction of the horse (withdrawal of the limb) to the flexion of the fetlock joint when using a light strength (1kg).    |
| 3     | Substantial | Reaction of the horse (withdrawal of the limb) to the flexion of the fetlock joint before using strength.                |
| 4     | Severe      | Violent withdrawal of the limb when flexion the fetlock joint without strength                                           |

**Table S4: Subcutaneous oedema grading system**

| Score |             | Physical criteria                                                              |
|-------|-------------|--------------------------------------------------------------------------------|
| 0     | Normal      | No oedema                                                                      |
| 1     | Mild        | Minimal oedema at the injection site                                           |
| 2     | Moderate    | Mild oedema over the fetlock joint                                             |
| 3     | Substantial | Oedema extending distally to the pastern and / or proximally to the metacarpus |
| 4     | Severe      | Oedema extending proximally to the carpus or hock                              |
