# Supplementary material for: Intra-Articular Injection of 2 Different Dosages of Autologous and Allogeneic Bone Marrow- and Umbilical Cord-Derived Mesenchymal Stem Cells Triggers a Variable Inflammatory Response of the Fetlock Joint on 12 Sound Experimental Horses
Source: Hindawi journal article supplement (doi:10.1155/2019/9431894), 2019-05-02
Supplement: f3 [file 9431894.f3.pdf]

Mean (standard deviation) or Median (first quartile, third quartile) scores and values of clinical and ultrasound parameters

| Treatment           | Day | Fetlock circumference | Lameness (grade/5) | Flexion sensitivity | Joint effusion | Subcutaneous oedema | Synovial fluid effusion |
|---------------------|-----|-----------------------|--------------------|---------------------|----------------|---------------------|-------------------------|
| Placebo             | 0   | 27,7 (1.2)            | 0 (0-0)            | 0 (0-0)             | 0 (0-0)        | 0 (0-0)             | 0 (0-0)                 |
|                     | 1   | 27,6 (1.2)            | 0 (0-0)            | 0 (0-0)             | 0 (0-0.25)     | 0 (0-0)             | 0.5 (0-1)               |
|                     | 3   | 27,2 (1)              | 0 (0-0)            | 0 (0-0)             | 0 (0-0)        | 0 (0-0)             | 0 (0-0)                 |
|                     | 7   | 27,4 (1.2)            | 0 (0-0)            | 0 (0-0)             | 0 (0-0)        | 0 (0-0)             | 0 (0-0)                 |
|                     | 14  | 27,4 (1.2)            | 0 (0-0)            | 0 (0-0)             | 0 (0-0)        | 0 (0-0)             | 0 (0-0)                 |
|                     | 28  | 27,6 (1.2)            | 0 (0-0)            | 0 (0-0)             | 0 (0-0)        | 0 (0-0)             | 0 (0-0)                 |
| Autologous BM-MSCs  | 0   | 27,6 (1.7)            | 0 (0-0)            | 0 (0-0)             | 0 (0-0)        | 0 (0-0)             | 0 (0-0)                 |
|                     | 1   | 27,8 (1.9)            | 0 (0-0)            | 0 (0-0)             | 1 (0-1.25)     | 0 (0-0)             | 1 (0.75-2)              |
|                     | 3   | 27,6 (2)              | 0 (0-0)            | 0 (0-0)             | 1 (0-1)        | 0 (0-0)             | 1 (0-1.25)              |
|                     | 7   | 27,7 (2.2)            | 0 (0-0)            | 0 (0-0)             | 0 (0-1)        | 0 (0-0)             | 0 (0-1)                 |
|                     | 14  | 27,6 (2)              | 0 (0-0)            | 0 (0-0)             | 0 (0-1.5)      | 0 (0-0)             | 0 (0-1)                 |
|                     | 28  | 27,7 (2)              | 0 (0-0)            | 0 (0-0)             | 0 (0-0.5)      | 0 (0-0)             | 0 (0-0.5)               |
| Allogeneic BM-MSCs  | 0   | 27,5 (1.9)            | 0 (0-0)            | 0 (0-0)             | 0 (0-0.25)     | 0 (0-0)             | 0 (0-0)                 |
|                     | 1   | 27,5 (2)              | 0 (0-0)            | 0 (0-0)             | 1.5 (1-2)      | 0 (0-0)             | 2 (0.75-2)              |
|                     | 3   | 27,5 (2)              | 0 (0-0)            | 0 (0-0)             | 1 (0-1)        | 0 (0-0)             | 1 (0-2)                 |
|                     | 7   | 27,6 (2.1)            | 0 (0-0)            | 0 (0-0)             | 1 (0-1)        | 0 (0-0)             | 0 (0-1.5)               |
|                     | 14  | 27,5 (2)              | 0 (0-0)            | 0 (0-0)             | 0 (0-1)        | 0 (0-0)             | 0 (0-1)                 |
|                     | 28  | 27,7 (1.9)            | 0 (0-0)            | 0 (0-0)             | 0 (0-0)        | 0 (0-0)             | 0 (0-0)                 |
| Allogeneic UCB-MSCs | 0   | 27,7 (1.2)            | 0 (0-0)            | 0 (0-0)             | 0 (0-0)        | 0 (0-0)             | 0 (0-0)                 |
|                     | 1   | 28 (1.3)              | 0 (0-0)            | 0 (0-0)             | 0.5 (0-2)      | 0 (0-0)             | 1 (0-2)                 |
|                     | 3   | 27,5 (1.1)            | 0 (0-0)            | 0 (0-0)             | 0 (0-1)        | 0 (0-0)             | 1 (0-1)                 |
|                     | 7   | 27,4 (1.3)            | 0 (0-0)            | 0 (0-0)             | 0 (0-0.5)      | 0 (0-0)             | 0 (0-0)                 |
|                     | 14  | 27,5 (1.1)            | 0 (0-0)            | 0 (0-0)             | 1 (0-1)        | 0 (0-0)             | 0 (0-1)                 |
|                     | 28  | 27,9 (1.4)            | 0 (0-0)            | 0 (0-0)             | 0 (0-1)        | 0 (0-0)             | 0 (0-0.5)               |

**Mean (standard deviation) or Median (first quartile, third quartile) scores and values of clinical and ultrasound parameters**

| Dosage     | Day | Fetlock circumference (mean value) | Lameness (grade/5) | Flexion sensitivity | Joint effusion | Subcutaneous oedema | Synovial fluid effusion |
|------------|-----|------------------------------------|--------------------|---------------------|----------------|---------------------|-------------------------|
| 10 million | 0   | 27,7 (1,5)                         | 0 (0-0)            | 0 (0-0)             | 0 (0-0.75)     | 0 (0-0)             | 0 (0-0)                 |
|            | 1   | 27,8 (1,7)                         | 0 (0-0)            | 0 (0-0)             | 1.5 (1-2)      | 0 (0-0)             | 2 (0.25-2)              |
|            | 3   | 27,7 (1,7)                         | 0 (0-0)            | 0 (0-0)             | 1 (0.5-2)      | 0 (0-0)             | 2 (0-2)                 |
|            | 7   | 27,9 (1,9)                         | 0 (0-0)            | 0 (0-0)             | 1 (0-1.5)      | 0 (0-0)             | 0 (0-1.5)               |
|            | 14  | 27,9 (1,7)                         | 0 (0-0)            | 0 (0-0)             | 1 (0-2)        | 0 (0-0)             | 1 (0-2)                 |
|            | 28  | 28,2 (1,6)                         | 0 (0-0)            | 0 (0-0)             | 0 (0-1)        | 0 (0-0)             | 0 (0-1.5)               |
| 20 million | 0   | 27,5 (1,7)                         | 0 (0-0)            | 0 (0-0)             | 0 (0-0)        | 0 (0-0)             | 0 (0-0)                 |
|            | 1   | 27,7 (1,8)                         | 0 (0-0)            | 0 (0-0)             | 1 (0-1)        | 0 (0-0)             | 1 (0.25-1)              |
|            | 3   | 27,3 (1,7)                         | 0 (0-0)            | 0 (0-0)             | 0 (0-1)        | 0 (0-0)             | 1 (0-1)                 |
|            | 7   | 27,3 (1,8)                         | 0 (0-0)            | 0 (0-0)             | 0 (0-0)        | 0 (0-0)             | 0 (0-1)                 |
|            | 14  | 27,3 (1,7)                         | 0 (0-0)            | 0 (0-0)             | 0 (0-0.75)     | 0 (0-0)             | 0 (0-0.75)              |
|            | 28  | 27,5 (1,8)                         | 0 (0-0)            | 0 (0-0)             | 0 (0-0)        | 0 (0-0)             | 0 (0-0)                 |

Mean (standard deviation) or Median (first quartile, third quartile) values of synovial fluid parameters

| Treatment           | Day | Total protein (g/100 mL) | Total nucleated cell counts/ $\mu$ L | PGE2 (pg/mL)  | CTX II (pg/mL) |
|---------------------|-----|--------------------------|--------------------------------------|---------------|----------------|
| Placebo             | 0   | 2 (0.2)                  | 84,5 (40-116)                        | 407 (367-429) | 131 (86-192)   |
|                     | 7   | 2.1 (0.2)                | 141 (90-192)                         | 386 (335-479) | 145 (76-214)   |
|                     | 14  | 1.9 (0.2)                | 119 (70-160)                         | 343 (289-433) | 139 (126-236)  |
|                     | 28  | 1.7 (0.2)                | 98 (45-158)                          | 406 (350-438) | 148 (122-190)  |
| Autologous BM-MSCs  | 0   | 2 (0.2)                  | 62 (39-139)                          | 401 (358-544) | 136 (96-172)   |
|                     | 7   | 2.7 (1)                  | 869 (143-2254)                       | 432 (247-793) | 106 (67-147)   |
|                     | 14  | 2.3 (0.5)                | 276 (140-1558)                       | 444 (281-606) | 102 (71-150)   |
|                     | 28  | 2 (0.7)                  | 342 (81-459)                         | 374 (198-432) | 122 (115-141)  |
| Allogeneic BM-MSCs  | 0   | 2(0.2)                   | 71 (59-187)                          | 459 (314-546) | 132 (85-182)   |
|                     | 7   | 2.4 (0.6)                | 1110 (203-2805)                      | 313 (210-426) | 91 (62-182)    |
|                     | 14  | 2.1 (0.4)                | 2445 (128-3440)                      | 401 (279-495) | 92 (76-157)    |
|                     | 28  | 1.9 (0.3)                | 497 (176-687)                        | 332 (213-426) | 150 (103-192)  |
| Allogeneic UCB-MSCs | 0   | 2(0.2)                   | 89 (47-130)                          | 419 (343-510) | 131 (91-162)   |
|                     | 7   | 2.5 (0.9)                | 614 (317-2268)                       | 354 (235-418) | 95 (53-128)    |
|                     | 14  | 2.3 (0.6)                | 864 (199-1739)                       | 335 (265-386) | 96 (82-131)    |
|                     | 28  | 2.2 (0.8)                | 479 (270-692)                        | 360 (321-393) | 146 (117-189)  |

**Mean (standard deviation) or Median (first quartile, third quartile) values of synovial fluid parameters**

| Dosage     | Day | Total protein (g/100 mL) | Total nucleated cell counts/ $\mu$ L | PGE2 (pg/mL)  | CTX II (pg/mL) |
|------------|-----|--------------------------|--------------------------------------|---------------|----------------|
| 10 million | 0   | 2 (0.3)                  | 91 (46-187)                          | 421 (368-513) | 85 (77-103)    |
|            | 7   | 2.9 (1.1)                | 2095 (744-4090)                      | 387 (325-435) | 59 (35-87)     |
|            | 14  | 2.2 (0.6)                | 1374 (361-2310)                      | 404 (382-479) | 88 (67-128)    |
|            | 28  | 2.1 (0.7)                | 469 (436-644)                        | 374 (274-393) | 128 (118-145)  |
| 20 million | 0   | 2 (0.1)                  | 69 (46-124)                          | 397 (261-560) | 167 (139-265)  |
|            | 7   | 2.2 (0.3)                | 236 (129-1955)                       | 279 (207-565) | 145 (210-187)  |
|            | 14  | 2.2 (0.5)                | 204 (83-2547)                        | 284 (201-418) | 119 (84-189)   |
|            | 28  | 2.0 (0.5)                | 261 (61-622)                         | 339 (291-513) | 150 (114-205)  |
