# Supplementary material for: Intra-Articular Injection of 2 Different Dosages of Autologous and Allogeneic Bone Marrow- and Umbilical Cord-Derived Mesenchymal Stem Cells Triggers a Variable Inflammatory Response of the Fetlock Joint on 12 Sound Experimental Horses
Source: Stem Cells Int. 2019 May 2;2019:9431894. doi: 10.1155/2019/9431894 (PMC6525957; doi:10.1155/2019/9431894)
Supplement: Supplementary 2 — Dataset S2: scores and values of clinical, ultrasound, and synovial fluid parameters. [file 9431894.f2.xlsx]

## Sheet: Database
	1: left front		1: autologous BM-MSCs					Data excluded from statistical analysis
	2: right front		2: allogenic BM-MSCs											Not performed				0: "tolerated category" with grade ≤ 1/4				0: ≤ 200 cells/µL
	3: left hind		3: allogenic UCB-MSCs											Missing value				1: "not tolerated category" with grade > 1/4				1: > 200 cells/µL
	4: right hind		4: PBS control				Clinical parameters				Ultrasound parameters		Synovial fluid parameters					Parameters transformed for the statistical analysis
Horse number	Limb	Fetlock number	Treatment	Cell Line Injected	Dose (million cells)	Day	Fetlock circumference (mean value)	Lameness (grade/5)	Flexion sensitivity	Joint effusion	Subcutaneous oedema	Synovial fluid effusion	Total protein (g/100 mL)	Total nucleated cell counts/µL	PGE2 (pg/mL)	CTX II (pg/mL)		Binary Flexion sensitivity	Binary Joint effusion	Binary Subcutaneous oedema	Binary Synovial fluid effusion	Binary Total nucleated cell counts/µL	Log(PGE2)	Log (CTX II)
1	1	11	2	BM-02	20	0	24.5667	0	0	0	0	0	2	218	124.7	327.6		0	0	0	0	1	2.09587	2.51534
1	1	11	2		20	1	24.8333	0	0	0	0	0						0	0	0	0
1	1	11	2		20	3	24.7	0	0	0	0	0						0	0	0	0
1	1	11	2		20	7	25.3333	0	0	0	0	0	1.9	854	296.1	213.4		0	0	0	0	1	2.47144	2.32919
1	1	11	2		20	14	25.0333	0	0	2	0	1	3	3865	29	80.3		0	1	0	0	1	1.4624	1.90472
1	1	11	2		20	28	25.4667	0	0	0	0	0	2.1	497	29.1	167.5		0	0	0	0	1	1.46389	2.22401
1	2	12	1	BM-01	20	0	25.5	0	0	0	0	0	2	198	172.6	327		0	0	0	0	0	2.23704	2.51455
1	2	12	1		20	1	25.3667	0	0	1	0	1						0	0	0	0
1	2	12	1		20	3	25.0667	0	0	0	0	0						0	0	0	0
1	2	12	1		20	7	24.6	0	0	0	0	0	2.5	2307	246.9	115.9		0	0	0	0	1	2.39252	2.06408
1	2	12	1		20	14	25	0	0	1	0	1	2.9	2912	281.4	75.7		0	0	0	0	1	2.44932	1.8791
1	2	12	1		20	28	24.4667	0	0	0	0	0	2.4	395	38	113.6		0	0	0	0	1	1.57978	2.05538
1	3	13	4		20	0	25.4333	0	0	0	0	0	2	132	317.7	141.7		0	0	0	0	0	2.50202	2.15137
1	3	13	4		20	1	26.1667	0	0	1	0	1						0	0	0	0
1	3	13	4		20	3	25.9	0	0	0	0	0						0	0	0	0
1	3	13	4		20	7	26.3	0	0	0	0	0	1.9	190	433.6	134.3		0	0	0	0	0	2.63709	2.12808
1	3	13	4		20	14	26.1	0	0	0	0	0	2	182	306.9	129.7		0	0	0	0	0	2.487	2.11294
1	3	13	4		20	28	25.6333	0	0	0	0	0	2	98	433.6	152.6		0	0	0	0	0	2.63709	2.18355
1	4	14	3	UCB-01	20	0	25.8333	0	0	0	0	0	2	198	374	148.6		0	0	0	0	0	2.57287	2.17202
1	4	14	3		20	1	27.0333	0	0	1	0	1						0	0	0	0
1	4	14	3		20	3	26.2667	0	0	0	0	1						0	0	0	0
1	4	14	3		20	7	26.3667	0	0	0	0	1	2.2	1812	576.2	109		0	0	0	0	1	2.76057	2.03743
1	4	14	3		20	14	26.3667	0	0	1	0	1	2.8	2710	242.9	95.8		0	0	0	0	1	2.38543	1.98137
1	4	14	3		20	28	26.7	0	0	0	0	0	1.8	479	317.7	146.3		0	0	0	0	1	2.50202	2.16524
2	1	21	2	BM-03	20	0	26.6667	0	0	0	0	0	2.1	65	50.1	533.5		0	0	0	0	0	1.69984	2.72713
2	1	21	2		20	1	26.5333	0	0	0	0	0						0	0	0	0
2	1	21	2		20	3	27.0667	0	0	0	0	0						0	0	0	0
2	1	21	2		20	7	26.6667	0	0	0	0	0	1.8	154	204	341.9		0	0	0	0	0	2.30963	2.5339
2	1	21	2		20	14	25.8	0	0	0	0	0	1.5	80	306.9	457.2		0	0	0	0	0	2.487	2.66011
2	1	21	2		20	28	26.2333	0	0	0	0	0	1.7	59	30.6	372.3		0	0	0	0	0	1.48572	2.57089
2	2	22	1	BM-02	20	0	27.3667	0	0	0	0	0	2	153	416	191.6		0	0	0	0	0	2.61909	2.2824
2	2	22	1		20	1	27.1333	0	0	0	0	0						0	0	0	0
2	2	22	1		20	3	26.4	0	0	0	0	0						0	0	0	0
2	2	22	1		20	7	26.8	0	0	0	0	0	1.7	121	93.6	188.7		0	0	0	0	0	1.97128	2.27577
2	2	22	1		20	14	26.7	0	0	0	0	0	1.7	100	44.5	223.2		0	0	0	0	0	1.64836	2.34869
2	2	22	1		20	28	26.6333	0	0	0	0	0	1.6	67	37.7	204.8		0	0	0	0	0	1.57634	2.31133
2	3	23	3	UCB-06	20	0	28.9333	0	0	0	0	0	2	47	557.2	265.6		0	0	0	0	0	2.74601	2.42423
2	3	23	3		20	1	29.0667	0	0	0	0	1						0	0	0	0
2	3	23	3		20	3	28.4	0	0	0	0	1						0	0	0	0
2	3	23	3		20	7	28.3667	0	0	0	0	0	1.8	380	226.3	194.5		0	0	0	0	1	2.35468	2.28892
2	3	23	3		20	14	28.2667	0	0	0	0	0	1.7	864	42	207.7		0	0	0	0	1	1.62325	2.31744
2	3	23	3		20	28	28.8333	0	0	0	0	0	2	760	339	188.7		0	0	0	0	1	2.5302	2.27577
2	4	24	4		20	0	28.5	0	0	0	0	0	1.9	65	367	274.8		0	0	0	0	0	2.56467	2.43902
2	4	24	4		20	1	28.3	0	0	0	0	1						0	0	0	0
2	4	24	4		20	3	28.3	0	0	0	0	1						0	0	0	0
2	4	24	4		20	7	28.2	0	0	0	0	0	1.6	29	324.8	333.9		0	0	0	0	0	2.51162	2.52362
2	4	24	4		20	14	28.4333	0	0	0	0	0	1.6	58	135.7	279.4		0	0	0	0	0	2.13258	2.44623
2	4	24	4		20	28	28.1	0	0	0	0	0	1.6	35	370.5	245.5		0	0	0	0	0	2.56879	2.39005
3	1	31	1	BM-03	20	0	25.9333	0	0	0	0	0	2	0	378.7	152		0	0	0	0	0	2.5783	2.18184
3	1	31	1		20	1	26.4667	0	0	1	0	1						0	0	0	0
3	1	31	1		20	3	25.6667	0	0	1	0	1						0	0	0	0
3	1	31	1		20	7	25.6333	0	0	1	0	1	3	3826	34.8	58		0	0	0	0	1	1.54158	1.76343
3	1	31	1		20	14	25.8667	0	0	0	0	0	2.3	2374	281.4	51.1		0	0	0	0	1	2.44932	1.70842
3	1	31	1		20	28	26.2667	0	0	0	0	0	2.1	663	381	62		0	0	0	0	1	2.58092	1.79239
3	2	32	2	BM-02	20	0	26.2	0	0	0	0	0	1.8	45	226.3	124.5		0	0	0	0	0	2.35468	2.09517
3	2	32	2		20	1	25.7667	0	0	1	0	1						0	0	0	0
3	2	32	2		20	3	25.7667	0	0	1	0	1						0	0	0	0
3	2	32	2		20	7	25.5333	0	0	0	0	0	2.6	2003	30.3	62		0	0	0	0	1	1.48144	1.79239
3	2	32	2		20	14	26.2667	0	0	0	0	0	2	2605	49.3	71.7		0	0	0	0	1	1.69285	1.85552
3	2	32	2		20	28	26.1	0	0	0	0	0	2.2	1032	331.9	81.5		0	0	0	0	1	2.52101	1.91116
3	3	33	4		20	0	27.5667	0	0	0	0	0	1.8	0	447.8	271.9		0	0	0	0	0	2.65108	2.43441
3	3	33	4		20	1	27.5	0	0	0	0	1						0	0	0	0
3	3	33	4		20	3	26.6667	0	0	0	0	0						0	0	0	0
3	3	33	4		20	7	27.0667	0	0	0	0	0	2	28	949.1	284		0	0	0	0	0	2.97731	2.45332
3	3	33	4		20	14	26.4667	0	0	0	0	0	1.8	37	667.3	201.4		0	0	0	0	0	2.82432	2.30406
3	3	33	4		20	28	28.0667	0	0	0	0	0	1.8	33				0	0	0	0	0
3	4	34	3	UCB-06	20	0	27.5333	0	0	0	0	0	2	0	462	138.8		0	0	0	0	0	2.66464	2.14239
3	4	34	3		20	1	28	0	0	2	0	2						0	1	0	0
3	4	34	3		20	3	27.0667	0	0	1	0	1						0	0	0	0
3	4	34	3		20	7	27.3	0	0	1	0	1	2.8	2403	70.6	50.5		0	0	0	0	1	1.8488	1.70329
3	4	34	3		20	14	27.2	0	0	1	0	0	2	2740	335.4	82		0	0	0	0	1	2.52556	1.91381
3	4	34	3		20	28	27.8333	0	0	0	0	0	1.9	1059	527.3	99.8		0	0	0	0	1	2.72206	1.99913
4	1	41	3	UCB-01	20	0	27.1333	0	0	0	0	0	2	0	557.6	130.5		0	0	0	0	0	2.74632	2.11561
4	1	41	3		20	1	27	0	0	0	0	0						0	0	0	0
4	1	41	3		20	3	26.4	0	0	0	0	0						0	0	0	0
4	1	41	3		20	7	25.9333	0	0	0	0	0	2.1	76	531.1	142.9		0	0	0	0	0	2.72518	2.15503
4	1	41	3		20	14	26.0667	0	0	0	0	0	2	79	306.9	115.3		0	0	0	0	0	2.487	2.06183
4	1	41	3		20	28	26.4333	0	0	0	0	0	2	56				0	0	0	0	0
4	2	42	4		20	0	26.3667	0	0	0	0	0	2.4	0	423	122.2		0	0	0	0	0	2.62634	2.08707
4	2	42	4		20	1	26.3667	1	0	0	0	0						0	0	0	0
4	2	42	4		20	3	26	1	0	0	0	0						0	0	0	0
4	2	42	4		20	7	26.1333	2	0	0	0	0	2.2	94	494.4	164.1		0	0	0	0	0	2.69408	2.21511
4	2	42	4		20	14	26.5333	0	0	0	0	0	2	119	342.5	161.8		0	0	0	0	0	2.53466	2.20898
4	2	42	4		20	28	27.3333	0	0	0	0	0	1.7	177	642.9	129.1		0	0	0	0	0	2.80814	2.11093
4	3	43	1	BM-04	20	0	27.3333	0	0	2	0	1	2.2	36	583	124		0	0	0	0	0	2.76567	2.09342
4	3	43	1		20	1	28.7	0	0	2	0	1						0	0	0	0
4	3	43	1		20	3	27.6667	0	0	1	0	1						0	0	0	0
4	3	43	1		20	7	27.9667	0	0	1	0	1	2.3	48	1030.6	146.3		0	0	0	0	0	3.01309	2.16524
4	3	43	1		20	14	27.8	0	0	0	0	0	2	53	692.2	133.7		0	0	0	0	0	2.84023	2.12613
4	3	43	1		20	28	28.0333	0	0	0	0	0	1.8	31	788.2	135.4		0	0	0	0	0	2.89664	2.13162
4	4	44	2	BM-03	20	0	28	0	0	2	0	1	2.2	63	692.2	138.8		0	0	0	0	0	2.84023	2.14239
4	4	44	2		20	1	28.5333	0	0	2	0	2						0	0	0	0
4	4	44	2		20	3	27.5667	0	0	1	0	1						0	0	0	0
4	4	44	2		20	7	28.2667	0	0	1	0	1	2.3	151	1143.1	141.7		0	0	0	0	0	3.05808	2.15137
4	4	44	2		20	14	27.9667	0	0	0	0	0	2.2	124	975.6	91.8		0	0	0	0	0	2.98927	1.96284
4	4	44	2		20	28	28.3	0	0	0	0	0	1.9	234	892.9	103.3		0	0	0	0	1	2.9508	2.0141
5	1	51	3	UCB-06	20	0	29.9333	0	0	0	0	0	1.9	134	561	174.4		0	0	0	0	0	2.74896	2.24155
5	1	51	3		20	1	30.2	0	0	0	0	1						0	0	0	0
5	1	51	3		20	3	30	0	0	0	0	1						0	0	0	0
5	1	51	3		20	7	29.9333	0	0	0	0	0	2.4	2133	262.5	113		0	0	0	0	1	2.41913	2.05308
5	1	51	3		20	14	29.6333	0	0	1	0	1	3.3	1575	189.2	122.2		0	0	0	0	1	2.27692	2.08707
5	1	51	3		20	28	31.1333	0	0	1	0	3	4	3359	321.2	258.2		0	0	0	1	1	2.50678	2.41196
5	2	52	4		20	0	29.6333	0	0	0	0	0	1.8	146	868.2	164.7		0	0	0	0	0	2.93862	2.21669
5	2	52	4		20	1	30	0	0	0	0	1						0	0	0	0
5	2	52	4		20	3	28.9333	0	0	0	0	1						0	0	0	0
5	2	52	4		20	7	30.0667	0	0	0	0	0	1.9	102	734.9	156.6		0	0	0	0	0	2.86623	2.19479
5	2	52	4		20	14	29.7	0	0	0	0	0	2	101	839.3	138.8		0	0	0	0	0	2.92392	2.14239
5	2	52	4		20	28	29.6667	0	0	0	0	0	1.7	138	380.6	143.2		0	0	0	0	0	2.58047	2.15594
5	3	53	2	BM-03	20	0	30.7667	0	0	0	0	0	1.8	90	1425	159.5		0	0	0	0	0	3.15381	2.20276
5	3	53	2		20	1	31.1	0	0	2	0	2						0	1	0	1
5	3	53	2		20	3	30.7	0	0	0	0	2						0	0	0	0
5	3	53	2		20	7	30.9	0	0	0	0	0	2	219	642.9	151.5		0	0	0	0	1	2.80814	2.18041
5	3	53	2		20	14	30.7	0	0	0	0	0	2	90	933.5	150.9		0	0	0	0	0	2.97011	2.17869
5	3	53	2		20	28	30.3333	0	0	1	0	1	1.8	55	513.4	191.7		0	0	0	0	0	2.71046	2.28262
5	4	54	1	BM-05	20	0	30.8667	0	0	0	0	0	2	93	986.4	136		0	0	0	0	0	2.99405	2.13354
5	4	54	1		20	1	31	0	0	1	0	2						0	0	0	1
5	4	54	1		20	3	30.3667	0	0	1	0	1						0	0	0	0
5	4	54	1		20	7	30.7333	0	0	0	0	0	2	116	792.7	92.9		0	0	0	0	0	2.89911	1.96802
5	4	54	1		20	14	30.8333	0	0	0	0	1	2	77	675.6	98.7		0	0	0	0	0	2.82969	1.99432
5	4	54	1		20	28	30.5	0	0	0	0	0	1.8	27	579.9	123.2		0	0	0	0	0	2.76335	2.09061
6	1	61	4		20	0	26.7667	0	0	0	0	0	2	104	309.2	497		0	0	0	0	0	2.49024	2.69636
6	1	61	4		20	1	26.4333	0	0	1	0	1						0	0	0	0
6	1	61	4		20	3	26.2333	0	0	0	0	0						0	0	0	0
6	1	61	4		20	7	26	0	0	0	0	0	2.5	216	279.3	230.2		0	0	0	0	1	2.44607	2.36211
6	1	61	4		20	14	26.4667	0	0	0	0	0	2.2	136	193.2	407.3		0	0	0	0	0	2.28601	2.60991
6	1	61	4		20	28	25.9333	0	0	0	0	0	1.8	102	452.7	233.9		0	0	0	0	0	2.65581	2.36903
6	2	62	3	UCB-06	20	0	27	0	0	0	0	0	2	89	299.933	321.6		0	0	0	0	0	2.47702	2.50732
6	2	62	3		20	1	26.8	0	0	0	0	0						0	0	0	0
6	2	62	3		20	3	26.4667	0	0	0	0	0						0	0	0	0
6	2	62	3		20	7	26.3667	0	0	0	0	0	2.2	253	418.9	159		0	0	0	0	1	2.62211	2.2014
6	2	62	3		20	14	26.4667	0	0	0	0	0	2.3	49	286.2	197.5		0	0	0	0	0	2.45667	2.29557
6	2	62	3		20	28	26.3	0	0	0	0	0	1.8	77	360.4	257.6		0	0	0	0	0	2.55678	2.41095
6	3	63	1	BM-06	20	0	27.7667	0	0	0	0	0	2	56	247.8	262.9		0	0	0	0	0	2.3941	2.41979
6	3	63	1		20	1	27.4333	0	0	0	0	1						0	0	0	0
6	3	63	1		20	3	27.4667	0	0	0	0	1						0	0	0	0
6	3	63	1		20	7	27.5	0	0	0	0	1	2.2	210	432.2	182.8		0	0	0	0	1	2.63568	2.26198
6	3	63	1		20	14	27.2667	0	0	0	0	0	2	276	238.3	232.8		0	0	0	0	1	2.37712	2.36698
6	3	63	1		20	28	27.5	0	0	0	0	0	1.7	288	348.6	248.1		0	0	0	0	1	2.54233	2.39463
6	4	64	2	BM-03	20	0	27.8667	0	0	0	0	0	2	73	342.8	204.9		0	0	0	0	0	2.53504	2.31154
6	4	64	2		20	1	27.5	0	0	1	0	1						0	0	0	0
6	4	64	2		20	3	27.5333	0	0	0	0	0						0	0	0	0
6	4	64	2		20	7	27.3667	0	0	0	0	0	2.4	43	215.2	245		0	0	0	0	0	2.33284	2.38917
6	4	64	2		20	14	27.2667	0	0	0	0	0	2.1	132	445.8	162.2		0	0	0	0	0	2.64914	2.21005
6	4	64	2		20	28	27.5	0	0	0	0	0	1.8	118	291.4	149.5		0	0	0	0	0	2.46449	2.17464
7	1	71	2	BM-10	10	0	26.8333	0	0	1	0	1	2.1	179	542.3	39.9		0	0	0	0	0	2.73424	1.60097
7	1	71	2		10	1	27.7667	0	0	4	0	4						0	1	0	1
7	1	71	2		10	3	26.9667	0	0	4	0	3
7	1	71	2		10	7	27.1333	1	0	4	0	4	3.1	3955	344.7	27.2
7	1	71	2		10	14	27.4667	0	0	3	0	3	1.7	820	389.8	104.4
7	1	71	2		10	28	27.6333	0	0	2	0	3	2.3	464	281	52.5
7	2	72	1	BM-07	10	0	26.9333	0	0	0	0	0	2.2	180	440.1	102.1		0	0	0	0	0	2.64355	2.00903
7	2	72	1		10	1	27.5	0	0	4	0	4						0	1	0	1
7	2	72	1		10	3	26.4333	0	0	2	0	2
7	2	72	1		10	7	26.6333	0	0	2	0	2	3.7	3938	374.4	118.3
7	2	72	1		10	14	27.1	0	0	2	0	2	1.8	889	250.3	119
7	2	72	1		10	28	27.6333	0	0	2	0	2	1.8	280	569.1	93.2
7	3	73	4		10	0	29	0	0	0	0	0	1.8	111	412.3	67.3		0	0	0	0	0	2.61521	1.82802
7	3	73	4		10	1	29.0667	0	0	0	0	0						0	0	0	0
7	3	73	4		10	3	28	0	0	0	0	0
7	3	73	4		10	7	28.4	0	0	0	0	0	2	87	392.9	59.1
7	3	73	4		10	14	28.3333	0	0	0	0	0	1.6	131	400.6	80.9
7	3	73	4		10	28	29.1	0	0	1	0	1	2	127	294.9	38.3
7	4	74	3	UCB-02	10	0	28.2333	0	0	1	0	1	1.7	141	408	82.1		0	0	0	0	0	2.61066	1.91434
7	4	74	3		10	1	30.2333	4	0	4	0	4						0	1	0	1
7	4	74	3		10	3	27.5667	1	0	4	0	4
7	4	74	3		10	7	28.2	0	0	4	0	4	3.4	623	274.2	14.6
7	4	74	3		10	14	28.7667	0	0	3	0	3	1.9	668	554.7	88.2
7	4	74	3		10	28	28.9	0	0	2	0	2	2	206	351.6	87.1
8	1	81	2	BM-10	10	0	24.9333	0	0	1	0	0	1.5	209	399.4	86.3		0	0	0	0	1	2.60141	1.93601
8	1	81	2		10	1	24.5	0	0	1	0	0						0	0	0	0
8	1	81	2		10	3	24.6333	0	0	1	0	0						0	0	0	0
8	1	81	2		10	7	24.6333	0	0	1	0	0	2	874	328.9	91.3		0	0	0	0	1	2.51706	1.96047
8	1	81	2		10	14	24.7667	0	0	0	0	0	1.6	2445	324.9	193.8		0	0	0	0	1	2.51175	2.28735
8	1	81	2		10	28	25	0	0	0	0	0	1.4	644	354.5	135.3		0	0	0	0	1	2.54962	2.1313
8	2	82	1	BM-08	10	0	25.0333	0	0	0	0	0	1.8	32	372.4	106.8		0	0	0	0	0	2.57101	2.02857
8	2	82	1		10	1	24.5667	0	0	0	0	0						0	0	0	0
8	2	82	1		10	3	24.8	0	0	0	0	0						0	0	0	0
8	2	82	1		10	7	24.9	0	0	0	0	0	1.8	313	393.1	146.9		0	0	0	0	1	2.5945	2.16702
8	2	82	1		10	14	24.9	0	0	0	0	0	1.8	215	443.5	163.3		0	0	0	0	1	2.64689	2.21299
8	2	82	1		10	28	25	0	0	0	0	0	1.4	121	432.2	143.2		0	0	0	0	0	2.63568	2.15594
8	3	83	3	UCB-02	10	0	26.6	0	0	1	0	1	1.8	113	324	83.2		0	0	0	0	0	2.51055	1.92012
8	3	83	3		10	1	26.8	0	0	1	0	1						0	0	0	0
8	3	83	3		10	3	27	0	0	1	0	1						0	0	0	0
8	3	83	3		10	7	25.8667	0	0	0	0	0	1.7	87	386.8	94.7		0	0	0	0	0	2.58749	1.97635
8	3	83	3		10	14	27	0	0	0	0	0	1.6	257	377.5	140.5		0	0	0	0	1	2.57692	2.14768
8	3	83	3		10	28	27.6667	0	0	1	0	0	1.4	127	628.9	158		0	0	0	0	0	2.79858	2.19866
8	4	84	4		10	0	27.0667	0	0	1	0	0	1.8	108	365.267	92.1		0	0	0	0	0	2.56261	1.96426
8	4	84	4		10	1	26.5	0	0	1	0	0						0	0	0	0
8	4	84	4		10	3	26.7333	0	0	1	0	0						0	0	0	0
8	4	84	4		10	7	26.3667	0	0	0	0	0	2.1	585				0	0	0	0	1
8	4	84	4		10	14	26.5333	0	0	0	0	0	2	962	410	127.4		0	0	0	0	1	2.61278	2.10517
8	4	84	4		10	28	27	0	0	0	0	0	1.7	412				0	0	0	0	1
9	1	91	1	BM-09	10	0	26.7667	0	0	0	0	0	1.7	226	342.8	150.1		0	0	0	0	1	2.53504	2.17638
9	1	91	1		10	1	26.5667	0	0	0	0	0						0	0	0	0
9	1	91	1		10	3	26.2333	0	0	0	0	0						0	0	0	0
9	1	91	1		10	7	26.6333	0	0	0	0	0	5	23945	1173.8	24.6		0	0	0	0	1	3.06959	1.39094
9	1	91	1		10	14	27.0333	1	0	2	0	2	2.5	1237	560.1	49.1		0	0	0	1	1	2.74827	1.69108
9	1	91	1		10	28	27.2667	0	0	2	0	2	1.6	466	197.62	120.5		0	0	0	1	1	2.29583	2.08099
9	2	92	2	BM-11	10	0	26.4667	0	0	0	0	0	1.8	226	469.1	174.3		0	0	0	0	1	2.67127	2.2413
9	2	92	2		10	1	26.3333	0	0	2	0	2						0	1	0	1
9	2	92	2		10	3	26.7333	0	0	2	0	3						0	1	0	1
9	2	92	2		10	7	26.7	0	0	1	0	2	2.5	8445	207.6	71.7		0	0	0	1	1	2.31723	1.85552
9	2	92	2		10	14	26.6	0	0	2	0	2	1.8	4268	250.3	99.8		0	0	0	0	1	2.39846	1.99913
9	2	92	2		10	28	27.0667	0	0	0	0	0	1.4	1314	212.5	215.3		0	0	0	0	1	2.32736	2.33304
9	3	93	4		10	0	28.9	0	0	0	0	0	1.9	226	446.5	139.3		0	0	0	0	1	2.64982	2.14395
9	3	93	4		10	1	28.1333	0	0	0	0	1						0	0	0	0
9	3	93	4		10	3	27.9	0	0	0	0	0						0	0	0	0
9	3	93	4		10	7	28.2333	0	0	0	0	0	2	740	236.7	70.5		0	0	0	0	1	2.3742	1.84819
9	3	93	4		10	14	28.3667	0	0	0	0	0	1.7	1763	270.8	52.5		0	0	0	0	1	2.43265	1.72016
9	3	93	4		10	28	28.5333	0	0	0	0	0	1.6	531	432.2	99.5		0	0	0	0	1	2.63568	1.99782
9	4	94	3	UCB-02	10	0	29.2333	0	0	0	0	0	2	226	419.467	127.4		0	0	0	0	1	2.6227	2.10517
9	4	94	3		10	1	28.0667	0	0	0	0	2						0	0	0	0
9	4	94	3		10	3	28.3333	0	0	2	0	2						0	0	0	0
9	4	94	3		10	7	28.3333	0	0	2	0	0	3.2	5485	198.9	34.1		0	0	0	0	1	2.29863	1.53275
9	4	94	3		10	14	28.4667	0	0	2	0	3						0	1	0	1
9	4	94	3		10	28	28.5667	0	0	1	0	1						0	0	0	0
10	1	101	3	UCB-06	10	0	26.3667	0	0	0	0	0	2.2	47	423.3	20.4		0	0	0	0	0	2.62665	1.30963
10	1	101	3		10	1	26.4	0	0	2	0	2						0	0	0	1
10	1	101	3		10	3	27.0667	0	0	2	0	2						0	0	0	1
10	1	101	3		10	7	26.6	0	0	1	0	0	4.8	4225	416.3	50.6		0	0	0	0	1	2.61941	1.70415
10	1	101	3		10	14	26.4667	0	0	0	0	0	2.4	673	372.9	49.5		0	0	0	0	1	2.57159	1.69461
10	1	101	3		10	28	27.4	0	0	0	0	0	2.2	412				0	0	0	0	1
10	2	102	4		10	0	27.1	0	0	0	0	0	2	43	378.6	56.8		0	0	0	0	0	2.57818	1.75435
10	2	102	4		10	1	26.7667	0	0	0	0	0						0	0	0	0
10	2	102	4		10	3	26.9333	0	0	0	0	0						0	0	0	0
10	2	102	4		10	7	27.0333	0	0	0	0	0	2	180	379	91.7		0	0	0	0	0	2.57864	1.96237
10	2	102	4		10	14	26.9	0	0	0	0	0	1.6	73	456.2	58.7		0	0	0	0	0	2.65916	1.76864
10	2	102	4		10	28	27.2333	0	0	0	0	0	1.6	54	289.7	87.3		0	0	0	0	0	2.46195	1.94101
10	3	103	1	BM-10	10	0	28.6333	0	0	1	0	0	2	42	400.95	38.6		0	0	0	0	0	2.60309	1.58659
10	3	103	1		10	1	28.8	0	0	2	0	2						0	1	0	1
10	3	103	1		10	3	29.4	0	0	2	0	2						0	0	0	1
10	3	103	1		10	7	29.3333	0	0	2	0	3	3.8	2095		39.4		0	0	0	1	1		1.5955
10	3	103	1		10	14	28.9333	0	0	2	0	1						0	1	0	0
10	3	103	1		10	28	29.0667	0	0	1	0	1						0	0	0	0
10	4	104	2	BM-11	10	0	29.0333	0	0	0	0	0	2	41	448.1	82.6		0	0	0	0	0	2.65137	1.91698
10	4	104	2		10	1	28.8	0	0	2	0	2						0	0	0	1
10	4	104	2		10	3	29	0	0	2	0	2						0	0	0	1
10	4	104	2		10	7	28.7333	0	0	2	0	2	4	3195		33		0	0	0	1	1		1.51851
10	4	104	2		10	14	28.8667	0	0	0	0	0	2.3	3014	400.6	30.6		0	0	0	0	1	2.60271	1.48572
10	4	104	2		10	28	28.9667	0	0	0	0	0	2.1	464				0	0	0	0	1
11	1	111	3	UCB-06	10	0	28	0	0	0	0	0	2	125	329.5	97.9		0	0	0	0	0	2.51786	1.99078
11	1	111	3		10	1	28.3667	0	0	0	0	0						0	0	0	0
11	1	111	3		10	3	27.6333	0	0	0	0	0						0	0	0	0
11	1	111	3		10	7	28	0	0	0	0	0	2	614	322	75.2		0	0	0	0	1	2.50786	1.87622
11	1	111	3		10	14	28	0	0	1	0	0	2	1903	394.4	91.7		0	0	0	0	1	2.59594	1.96237
11	1	111	3		10	28	28.1333	0	0	0	0	0	1.8	519	393.1	145.3		0	0	0	0	1	2.5945	2.16227
11	2	112	4		10	0	28	0	0	0	0	0	2.2	32	401.6	54.1		0	0	0	0	0	2.60379	1.7332
11	2	112	4		10	1	28.3667	0	0	0	0	0						0	0	0	0
11	2	112	4		10	3	27.8333	0	0	0	0	0						0	0	0	0
11	2	112	4		10	7	28.0667	0	0	0	0	0	2.2	519				0	0	0	0	1
11	2	112	4		10	14	28.5333	0	0	0	0	0	1.8	138	353.1	271.4		0	0	0	0	0	2.5479	2.43361
11	2	112	4		10	28	28.3333	0	0	0	0	0	1.8	98				0	0	0	0	0
11	3	113	2	BM-10	10	0	29.7667	0	0	0	0	0	2.2	41	508.3	70.5		0	0	0	0	0	2.70612	1.84819
11	3	113	2		10	1	30.0667	0	0	1	0	2						0	0	0	0
11	3	113	2		10	3	30.1667	0	0	1	0	2						0	0	0	0
11	3	113	2		10	7	29.9	0	0	1	0	0	2	1345				0	0	0	0	1
11	3	113	2		10	14	30.0667	0	0	0	0	1	2	4205	400.6	84.4		0	0	0	0	1	2.60271	1.92634
11	3	113	2		10	28	30.3333	0	0	0	0	0	2.2	729				0	0	0	0	1
11	4	114	1	BM-11	10	0	29.4367	0	0	0	0	0	2.3	62	528.8	84.7		0	0	0	0	0	2.72329	1.92788
11	4	114	1		10	1	30.1333	0	0	1	0	1						0	0	0	0
11	4	114	1		10	3	29.3	0	0	1	0	1						0	0	0	0
11	4	114	1		10	7	29.8667	0	0	0	0	0						0	0	0	0
11	4	114	1		10	14	29.6333	0	0	0	0	0	2.5	1350	490.9	65.7		0	0	0	0	1	2.69099	1.81757
11	4	114	1		10	28	29.8	0	0	0	0	0						0	0	0	0
12	1	121	4		10	0	27.6333	0	0	0	0	0	2.2	44	411.5	97.8		0	0	0	0	0	2.61437	1.99034
12	1	121	4		10	1	27.5	0	0	0	0	0						0	0	0	0
12	1	121	4		10	3	27.5	0	0	0	0	0						0	0	0	0
12	1	121	4		10	7	27.7667	0	0	0	0	1	2.3	91	364.4	55.7		0	0	0	0	0	2.56158	1.74586
12	1	121	4		10	14	27.4	0	0	0	0	0	2	66	342.5	124.7		0	0	0	0	0	2.53466	2.09587
12	1	121	4		10	28	28	0	0	0	0	0	1.4	32	152.6	175		0	0	0	0	0	2.18355	2.24304
12	2	122	3	UCB-06	10	0	27.9333	0	0	0	0	0	2.5	56	356.4	79.4		0	0	0	0	0	2.55194	1.89982
12	2	122	3		10	1	27.5	0	0	2	0	0						0	0	0	0
12	2	122	3		10	3	27.4333	0	0	0	0	0						0	0	0	0
12	2	122	3		10	7	27.8667	0	0	0	0	0	2.7	432		55.7		0	0	0	0	1		1.74586
12	2	122	3		10	14	28.2	1	0	3	0	3	3.4	1397	569.1	70.2		0	1	0	1	1	2.75519	1.84634
12	2	122	3		10	28	28.3667	0	0	3	0	2	2.2	469	382.1	117.4		0	1	0	1	1	2.58218	2.06967
12	3	123	1	BM-12	10	0	29.2667	0	0	0	0	0	2.2	124	560.1	84.4		0	0	0	0	0	2.74827	1.92634
12	3	123	1		10	1	29.5	0	0	1	0	2						0	0	0	1
12	3	123	1		10	3	29.5333	0	0	1	0	2						0	0	0	0
12	3	123	1		10	7	30.5	0	0	1	0	1	2.3	1424	477.5	95.5		0	0	0	0	1	2.67897	1.98
12	3	123	1		10	14	29.8333	0	0	2	0	2	3.3	1765	652.6	136.6		0	0	0	1	1	2.81465	2.13545
12	3	123	1		10	28	30.1667	0	0	1	0	2	2.3	436		107.4		0	0	0	1	1		2.031
12	4	124	2	BM-11	10	0	29.3	0	0	0	0	0	2.1	69	558.3	101.3		0	0	0	0	0	2.74687	2.00561
12	4	124	2		10	1	28.3	0	0	2	0	3						0	1	0	1
12	4	124	2		10	3	28.2667	0	0	1	0	2						0	0	0	1
12	4	124	2		10	7	30.0333	0	0	3	0	2	2.2	2675	452.9	62.5		0	1	0	1	1	2.656	1.79588
12	4	124	2		10	14	29.5667	0	0	2	0	3	2.7	2263	544.1	46		0	1	0	1	1	2.73568	1.66276
12	4	124	2		10	28	29.5	0	0	3	0	2	1.9	593	425.7	100.1		0	1	0	1	1	2.6291	2.00043
